# Supplementary material
Source: ML conference proceedings conference paper supplement (https://openaccess.thecvf.com/content/WACV2022/html/Kanchana_Revealing_Disocclusions_in_WACV_2022_paper.html)
Supplement: Supplementary file 1 [file Kanchana_Revealing_Disocclusions_in_WACV_2022_supplemental.zip]

Archive with 3 entries (3 files):
- Ours_EdgeConnect_Comparison_Compressed.mp4
- Ours_SynSin_Comparison_Compressed.mp4
- 1188-supp.pdf
